# Supplementary material for: Uncoupling of dynamin polymerization and GTPase activity revealed by the conformation-specific nanobody dynab
Source: eLife. 2017 Oct 12;6:e25197. doi: 10.7554/eLife.25197 (PMC5658065; doi:10.7554/eLife.25197)
Supplement: Figure 4—source data 8. [file elife-25197-fig4-data8.xlsx]

## Sheet: Feuil1
																EGFP			Dynab-EGFP
	Date	Plasmid	Interval (s)	result n° (per ROI)	Bounding Rectangle Data				ROI name	Img name	Persistence (s)	GFP-filtered persistence	Dynab-filtered persistence			Mean	SEM	StDv	Mean	SEM	StDv
					BX	BY	Width	Height
	17.07.27	EGFP	1	1	0	96	7	240	0315-0185-0280	HeLa GFP - 01 Registered.tif	240	240	not Dynab			93.0256	3.63767	55.6457	94.4025	4.19378	64.426
		EGFP		1	1	23	5	45	0254-0200-0275	HeLa GFP - 01 Registered.tif	45	45	not Dynab
		EGFP		2	0	76	6	119	0	0	119	119	not Dynab
		EGFP		1	1	259	6	28	0294-0193-0259	HeLa GFP - 01 Registered.tif	28	28	not Dynab
		EGFP		1	0	67	5	64	0501-0216-0267	HeLa GFP - 01 Registered.tif	64	64	not Dynab
		EGFP		2	0	352	6	110	0	0	110	110	not Dynab
		EGFP		1	0	151	7	77	0173-0237-0288	HeLa GFP - 01 Registered.tif	77	77	not Dynab
		EGFP		1	2	134	5	44	0158-0226-0253	HeLa GFP - 01 Registered.tif	44	44	not Dynab
		EGFP		2	2	191	5	55	0	0	55	55	not Dynab
		EGFP		1	0	214	8	170	0357-0268-0276	HeLa GFP - 01 Registered.tif	170	170	not Dynab
		EGFP		1	1	222	9	131	0343-0304-0278	HeLa GFP - 01 Registered.tif	131	131	not Dynab
		EGFP		3	2	310	9	80	0351-0301-0183	HeLa GFP - 01 Registered.tif	80	80	not Dynab
		EGFP		1	3	129	5	36	0601-0296-0242	HeLa GFP - 01 Registered.tif	36	36	not Dynab
		EGFP		2	3	277	7	160	0	0	160	160	not Dynab
		EGFP		1	0	96	8	351	0421-0342-0279	HeLa GFP - 01 Registered.tif	351	351	not Dynab
		EGFP		1	0	313	6	202	0601-0376-0320	HeLa GFP - 01 Registered.tif	202	202	not Dynab
		EGFP		manual				140	0540-0360-0318	HeLa GFP - 01 Registered.tif	140	140	not Dynab
		EGFP		1	1	117	7	144	0145-0326-0306	HeLa GFP - 01 Registered.tif	144	144	not Dynab
		EGFP		1	0	41	8	139	0601-0173-0157	HeLa GFP - 02.tif	139	139	not Dynab
		EGFP		1	0	39	7	62	0069-0188-0171	HeLa GFP - 02.tif	62	62	not Dynab
		EGFP		2	0	242	6	91	0286-0198-0152	HeLa GFP - 02.tif	91	91	not Dynab
		EGFP		2	0	110	6	53	0598-0217-0132	HeLa GFP - 02.tif	53	53	not Dynab
		EGFP		1	0	81	6	51	0080-0200-0146	HeLa GFP - 02.tif	51	51	not Dynab
		EGFP		2	0	431	7	79	0511-0255-0142	HeLa GFP - 02.tif	79	79	not Dynab
		EGFP		2	3	492	6	50	0572-0175-0113	HeLa GFP - 02.tif	50	50	not Dynab
		EGFP		1	4	327	5	41	0291-0190-0108	HeLa GFP - 02.tif	41	41	not Dynab
		EGFP		2	0	189	8	156	0307-0250-0095	HeLa GFP - 02.tif	156	156	not Dynab
		EGFP		1	1	173	5	22	0263-0335-0073	HeLa GFP - 02.tif	22	22	not Dynab
		EGFP		2	0	206	6	46	0	0	46	46	not Dynab
		EGFP		1	0	264	6	45	0266-0341-0073	HeLa GFP - 02.tif	45	45	not Dynab
		EGFP		2	1	327	5	52	0362-0341-0072	HeLa GFP - 02.tif	52	52	not Dynab
		EGFP		1	0	185	6	48	0233-0188-0076	HeLa GFP - 03.tif	48	48	not Dynab
		EGFP		1	0	128	8	70	0140-0188-0093	HeLa GFP - 03.tif	70	70	not Dynab
		EGFP		1	1	278	5	155	0383-0207-0221	HeLa GFP - 03.tif	155	155	not Dynab
		EGFP		1	1	165	5	49	0244-0260-0370	HeLa GFP - 03.tif	49	49	not Dynab
		Dynab-EGFP		1	2	136	6	17	0102-0249-0137	HeLa DynAb - 01_w1561_t1.TIF	17	not GFP	17
		Dynab-EGFP		1	0	157	8	167	0137-0215-0169	HeLa DynAb - 01_w1561_t1.TIF	167	not GFP	167
		Dynab-EGFP		1	0	59	4	28	0601-0241-0165	HeLa DynAb - 01_w1561_t1.TIF	28	not GFP	28
		Dynab-EGFP		1	0	239	6	21	0254-0223-0206	HeLa DynAb - 01_w1561_t1.TIF	21	not GFP	21
		Dynab-EGFP		3	0	306	10	81	0412-0195-0271	HeLa DynAb - 01_w1561_t1.TIF	81	not GFP	81
		Dynab-EGFP		1	3	194	7	109	0190-0186-0306	HeLa DynAb - 01_w1561_t1.TIF	109	not GFP	109
		Dynab-EGFP		1	0	47	6	56	0038-0417-0159	HeLa DynAb - 03.tif	56	not GFP	56
		Dynab-EGFP		1	0	232	8	29	0308-0443-0175	HeLa DynAb - 03.tif	29	not GFP	29
		Dynab-EGFP		1	0	194	9	108	0314-0376-0308	HeLa DynAb - 03.tif	108	not GFP	108
	17.08.25	EGFP		1	0	84	7	150	0601-0161-0106	GFP - 01_w1561_t1.tif	150	150	not Dynab
		EGFP		1	0	157	5	62	0262-0196-0099	GFP - 01_w1561_t1.tif	62	62	not Dynab
		EGFP		1	0	250	6	94	0326-0190-0102	GFP - 01_w1561_t1.tif	94	94	not Dynab
		EGFP		1	0	144	7	111	0177-0169-0109	GFP - 01_w1561_t1.tif	111	111	not Dynab
		EGFP		1	0	73	7	90	0001-0162-0098	GFP - 01_w1561_t1.tif	90	90	not Dynab
		EGFP		2	0	260	10	65	0287-0153-0127	GFP - 01_w1561_t1.tif	65	65	not Dynab
		EGFP		1	0	186	5	73	0239-0198-0118	GFP - 01_w1561_t1.tif	73	73	not Dynab
		EGFP		1	0	346	7	126	0453-0242-0113	GFP - 01_w1561_t1.tif	126	126	not Dynab
		EGFP		1	0	354	6	158	0467-0221-0128	GFP - 01_w1561_t1.tif	158	158	not Dynab
		EGFP		4	0	532	6	52	0564-0166-0121	GFP - 01_w1561_t1.tif	52	52	not Dynab
		EGFP		3	0	332	7	67	0374-0182-0120	GFP - 01_w1561_t1.tif	67	67	not Dynab
		EGFP		3	0	353	4	62	0398-0186-0110	GFP - 01_w1561_t1.tif	62	62	not Dynab
		EGFP		1	0	339	7	80	0437-0240-0130	GFP - 01_w1561_t1.tif	80	80	not Dynab
		EGFP		1	0	431	7	61	0505-0238-0144	GFP - 01_w1561_t1.tif	61	61	not Dynab
		EGFP		2	0	298	7	67	0334-0189-0164	GFP - 01_w1561_t1.tif	67	67	not Dynab
		EGFP		2	0	273	8	164	0467-0243-0100	GFP - 02_w1561_t1.tif	164	164	not Dynab
		EGFP		1	0	135	9	57	0171-0255-0103	GFP - 02_w1561_t1.tif	57	57	not Dynab
		EGFP		2	0	240	9	91	0	0	91	91	not Dynab
		EGFP		1	0	233	12	205	0287-0242-0099	GFP - 02_w1561_t1.tif	205	205	not Dynab
		EGFP		1	0	107	5	90	0172-0326-0088	GFP - 02_w1561_t1.tif	90	90	not Dynab
		EGFP		1	0	142	8	85	0227-0054-0263	GFP - 04_w1561_t1.tif	85	85	not Dynab
		EGFP		1	0	136	6	38	0271-0060-0270	GFP - 04_w1561_t1.tif	38	38	not Dynab
		EGFP		2	0	402	7	64	0475-0063-0275	GFP - 04_w1561_t1.tif	64	64	not Dynab
		EGFP		1	0	18	6	129	0151-0083-0261	GFP - 04_w1561_t1.tif	129	129	not Dynab
		EGFP		1	0	69	7	76	0153-0061-0260	GFP - 04_w1561_t1.tif	76	76	not Dynab
		EGFP		1	0	238	5	35	0271-0088-0244	GFP - 04_w1561_t1.tif	35	35	not Dynab
		EGFP		1	0	301	6	56	0367-0084-0245	GFP - 04_w1561_t1.tif	56	56	not Dynab
		EGFP		2	0	309	7	34	0322-0098-0243	GFP - 04_w1561_t1.tif	34	34	not Dynab
		EGFP		2	0	196	7	110	0306-0098-0222	GFP - 04_w1561_t1.tif	110	110	not Dynab
		EGFP		2	0	71	10	112	0306-0169-0175	GFP - 04_w1561_t1.tif	112	112	not Dynab
		EGFP		1	0	119	10	120	0114-0177-0158	GFP - 04_w1561_t1.tif	120	120	not Dynab
		EGFP		3	2	289	6	63	0326-0165-0151	GFP - 04_w1561_t1.tif	63	63	not Dynab
		EGFP		1	2	192	8	86	0244-0194-0111	GFP - 04_w1561_t1.tif	86	86	not Dynab
		EGFP		2	3	283	9	97	0390-0222-0095	GFP - 04_w1561_t1.tif	97	97	not Dynab
		EGFP		2	0	474	8	57	0521-0100-0264	GFP - 08_w1561_t1.tif	57	57	not Dynab
		EGFP		2	2	369	7	46	0395-0070-0167	GFP - 08_w1561_t1.tif	46	46	not Dynab
		EGFP		1	1	69	9	32	0100-0086-0178	GFP - 08_w1561_t1.tif	32	32	not Dynab
		EGFP		1	2	180	7	79	0299-0148-0057	GFP - 08_w1561_t1.tif	79	79	not Dynab
		EGFP		1	2	267	7	48	0298-0149-0061	GFP - 08_w1561_t1.tif	48	48	not Dynab
		EGFP		1	3	245	5	41	0263-0107-0134	GFP - 08_w1561_t1.tif	41	41	not Dynab
		EGFP		2	2	305	7	104	0	0	104	104	not Dynab
		Dynab-EGFP		2	4	99	9	144	0176-0319-0103	DynAb-GFP - 01_w1561_t1.tif	144	not GFP	144
		Dynab-EGFP		1	4	107	7	91	0146-0329-0110	DynAb-GFP - 01_w1561_t1.tif	91	not GFP	91
		Dynab-EGFP		1	0	82	10	95	0173-0303-0179	DynAb-GFP - 01_w1561_t1.tif	95	not GFP	95
		Dynab-EGFP		1	0	235	14	169	0319-0364-0183	DynAb-GFP - 01_w1561_t1.tif	169	not GFP	169
		Dynab-EGFP		3	0	234	17	181	0387-0364-0115	DynAb-GFP - 01_w1561_t1.tif	181	not GFP	181
		Dynab-EGFP		1	1	202	8	105	0319-0269-0096	DynAb-GFP - 01_w1561_t1.tif	105	not GFP	105
		Dynab-EGFP		2	2	393	8	107	0559-0240-0087	DynAb-GFP - 01_w1561_t1.tif	107	not GFP	107
		Dynab-EGFP		1	1	324	7	100	0303-0160-0121	DynAb-GFP - 01_w1561_t1.tif	100	not GFP	100
		Dynab-EGFP		1	0	153	12	250	0487-0150-0187	DynAb-GFP - 01_w1561_t1.tif	250	not GFP	250
	17.09.06	EGFP		1	4	28	12	226	0275-0192-0213	Dynab-GFP - 01.tif	226	226	not Dynab
		EGFP		2	4	445	9	63	0480-0192-0217	Dynab-GFP - 01.tif	63	63	not Dynab
		EGFP		1	3	196	7	177	0374-0171-0217	Dynab-GFP - 01.tif	177	177	not Dynab
		EGFP		2	0	328	12	138	0367-0198-0234	Dynab-GFP - 01.tif	138	138	not Dynab
		EGFP		1	0	90	9	144	0137-0154-0298	Dynab-GFP - 01.tif	144	144	not Dynab
		EGFP		1	0	72	17	241	0258-0149-0314	Dynab-GFP - 01.tif	241	241	not Dynab
		EGFP		1	3	70	9	70	0116-0263-0220	Dynab-GFP - 01.tif	70	70	not Dynab
		EGFP		2	4	186	13	90	0268-0261-0218	Dynab-GFP - 01.tif	90	90	not Dynab
		EGFP		1	3	25	9	166	0202-0279-0232	Dynab-GFP - 01.tif	166	166	not Dynab
		EGFP		1	0	70	15	205	0067-0291-0219	Dynab-GFP - 01.tif	205	205	not Dynab
		EGFP		1	0	127	12	256	0237-0274-0271	Dynab-GFP - 01.tif	256	256	not Dynab
		EGFP		1	0	109	12	240	0355-0281-0319	Dynab-GFP - 01.tif	240	240	not Dynab
		EGFP		1	0	152	11	144	0320-0300-0234	Dynab-GFP - 01.tif	144	144	not Dynab
		EGFP		1	0	98	14	192	0377-0328-0291	Dynab-GFP - 01.tif	192	192	not Dynab
		EGFP		1	0	146	14	100	0230-0295-0298	Dynab-GFP - 01.tif	100	100	not Dynab
		EGFP		1	0	113	10	147	0215-0309-0319	Dynab-GFP - 01.tif	147	147	not Dynab
		EGFP		1	4	100	9	133	0146-0280-0361	Dynab-GFP - 01.tif	133	133	not Dynab
		EGFP		1	0	27	11	123	0078-0305-0187	Dynab-GFP - 01.tif	123	123	not Dynab
		EGFP		1	0	121	13	157	0284-0345-0225	Dynab-GFP - 01.tif	157	157	not Dynab
		EGFP		1	0	70	13	97	0116-0335-0222	Dynab-GFP - 01.tif	97	97	not Dynab
		EGFP		3	2	294	11	75	0352-0331-0237	Dynab-GFP - 01.tif	75	75	not Dynab
		EGFP		2	3	102	9	46	0128-0366-0336	Dynab-GFP - 01.tif	46	46	not Dynab
		EGFP		3	0	326	10	165	0396-0367-0338	Dynab-GFP - 01.tif	165	165	not Dynab
		EGFP		3	2	440	8	124	0388-0373-0353	Dynab-GFP - 01.tif	124	124	not Dynab
		EGFP		1	0	410	11	42	0428-0397-0313	Dynab-GFP - 01.tif	42	42	not Dynab
		EGFP		1	5	102	9	105	0169-0160-0180	GFP - 02.tif	105	105	not Dynab
		EGFP		2	0	442	13	62	0468-0164-0178	GFP - 02.tif	62	62	not Dynab
		EGFP		1	1	9	11	137	0026-0133-0232	GFP - 02.tif	137	137	not Dynab
		EGFP		1	5	108	11	70	0160-0177-0275	GFP - 02.tif	70	70	not Dynab
		EGFP		1	0	255	13	129	0300-0187-0289	GFP - 02.tif	129	129	not Dynab
		EGFP		2	3	576	6	18	0587-0341-0353	GFP - 02.tif	18	18	not Dynab
		EGFP		1	5	11	10	84	0042-0178-0226	GFP - 03.tif	84	84	not Dynab
		EGFP		1	4	118	7	52	0155-0240-0197	GFP - 03.tif	52	52	not Dynab
		EGFP		1	2	246	11	66	0320-0258-0218	GFP - 03.tif	66	66	not Dynab
		EGFP		1	0	278	12	88	0333-0247-0294	GFP - 03.tif	88	88	not Dynab
		EGFP		2	0	449	10	57	0491-0164-0229	GFP - 03.tif	57	57	not Dynab
		EGFP		1	0	39	13	89	0082-0161-0319	GFP - 03.tif	89	89	not Dynab
		EGFP		1	0	196	10	90	0271-0255-0308	GFP - 03.tif	90	90	not Dynab
		EGFP		1	3	481	5	35	0499-0235-0339	GFP - 03.tif	35	35	not Dynab
		EGFP		1	0	140	9	99	0176-0306-0370	GFP - 03.tif	99	99	not Dynab
		EGFP		2	0	437	8	68	0	0	68	68	not Dynab
		EGFP		1	5	4	7	177	0114-0399-0121	GFP - 04.tif	177	177	not Dynab
		EGFP		1	2	68	10	99	0123-0367-0144	GFP - 04.tif	99	99	not Dynab
		EGFP		2	2	150	11	138	0315-0306-0188	GFP - 04.tif	138	138	not Dynab
		EGFP		3	5	443	6	90	0476-0313-0237	GFP - 04.tif	90	90	not Dynab
		EGFP		2	0	269	19	152	0324-0229-0283	GFP - 04.tif	152	152	not Dynab
		EGFP		1	0	384	12	67	0411-0247-0283	GFP - 04.tif	67	67	not Dynab
		EGFP		1	3	299	13	128	0601-0212-0294	GFP - 04.tif	128	128	not Dynab
		EGFP		1	4	260	9	82	0291-0185-0253	GFP - 04.tif	82	82	not Dynab
		EGFP		2	0	416	10	93	0493-0114-0256	GFP - 04.tif	93	93	not Dynab
		EGFP		2	0	259	13	153	0404-0447-0371	GFP - 05.tif	153	153	not Dynab
		EGFP		2	3	119	7	71	0429-0443-0340	GFP - 05.tif	71	71	not Dynab
		EGFP		1	1	96	10	90	0147-0458-0228	GFP - 05.tif	90	90	not Dynab
		EGFP		1	0	61	12	217	0186-0356-0366	GFP - 05.tif	217	217	not Dynab
		EGFP		1	0	116	8	68	0143-0405-0148	GFP - 05.tif	68	68	not Dynab
		EGFP		1	3	254	8	86	0469-0413-0181	GFP - 05.tif	86	86	not Dynab
		EGFP		2	3	449	8	66	0	0	66	66	not Dynab
		EGFP		1	0	272	13	93	0295-0359-0142	GFP - 05.tif	93	93	not Dynab
		EGFP		1	0	115	12	119	0151-0336-0107	GFP - 05.tif	119	119	not Dynab
		EGFP		1	7	27	12	134	0111-0289-0115	GFP - 05.tif	134	134	not Dynab
		EGFP		2	6	179	13	143	0	0	143	143	not Dynab
		EGFP		1	0	312	12	112	0418-0210-0052	GFP - 05.tif	112	112	not Dynab
		Dynab-EGFP		1	6	339	7	28	0353-0352-0385	Dynab-GFP - 01.tif	28	not GFP	28
		Dynab-EGFP		1	4	278	7	36	0301-0282-0426	Dynab-GFP - 01.tif	36	not GFP	36
		Dynab-EGFP		1	4	178	12	385	0171-0239-0383	Dynab-GFP - 01.tif	385	not GFP	385
		Dynab-EGFP		1	2	127	9	366	0163-0234-0284	Dynab-GFP - 01.tif	366	not GFP	366
		Dynab-EGFP		1	2	158	11	184	0144-0212-0291	Dynab-GFP - 01.tif	184	not GFP	184
		Dynab-EGFP		1	3	63	7	152	0240-0194-0288	Dynab-GFP - 01.tif	152	not GFP	152
		Dynab-EGFP		1	0	293	8	138	0370-0289-0191	Dynab-GFP - 01.tif	138	not GFP	138
		Dynab-EGFP		1	2	354	10	136	0298-0235-0202	Dynab-GFP - 01.tif	136	not GFP	136
		Dynab-EGFP		1	3	51	7	29	0064-0200-0248	Dynab-GFP - 01.tif	29	not GFP	29
		Dynab-EGFP		2	2	312	8	102	0421-0203-0193	Dynab-GFP - 01.tif	102	not GFP	102
		Dynab-EGFP		2	2	375	7	40	0397-0201-0202	Dynab-GFP - 01.tif	40	not GFP	40
		Dynab-EGFP		1	0	167	6	37	0193-0119-0245	Dynab-GFP - 01.tif	37	not GFP	37
		Dynab-EGFP		1	0	36	10	126	0171-0103-0188	Dynab-GFP - 01.tif	126	not GFP	126
		Dynab-EGFP		1	3	185	12	219	0486-0214-0151	Dynab-GFP - 01.tif	219	not GFP	219
		Dynab-EGFP		1	0	62	9	38	0601-0394-0219	Dynab-GFP - 02.tif	38	not GFP	38
		Dynab-EGFP		1	0	48	5	63	0107-0382-0229	Dynab-GFP - 02.tif	63	not GFP	63
		Dynab-EGFP		2	1	134	5	26	0	0	26	not GFP	26
		Dynab-EGFP		1	0	71	7	66	0131-0428-0257	Dynab-GFP - 02.tif	66	not GFP	66
		Dynab-EGFP		4	0	431	9	35	0432-0439-0269	Dynab-GFP - 02.tif	35	not GFP	35
		Dynab-EGFP		2	0	380	8	75	0399-0409-0246	Dynab-GFP - 02.tif	75	not GFP	75
		Dynab-EGFP		2	0	231	12	104	0259-0344-0266	Dynab-GFP - 02.tif	104	not GFP	104
		Dynab-EGFP		1	2	170	7	111	0198-0327-0268	Dynab-GFP - 02.tif	111	not GFP	111
		Dynab-EGFP		1	1	113	8	69	0159-0319-0209	Dynab-GFP - 02.tif	69	not GFP	69
		Dynab-EGFP		1	0	95	7	56	0191-0309-0196	Dynab-GFP - 02.tif	56	not GFP	56
		Dynab-EGFP		2	5	170	8	52	0	0	52	not GFP	52
		Dynab-EGFP		1	0	149	8	47	0174-0295-0183	Dynab-GFP - 02.tif	47	not GFP	47
		Dynab-EGFP		1	0	153	9	136	0304-0324-0285	Dynab-GFP - 02.tif	136	not GFP	136
		Dynab-EGFP		2	3	119	6	49	0166-0326-0289	Dynab-GFP - 02.tif	49	not GFP	49
		Dynab-EGFP		2	0	238	9	94	0233-0324-0306	Dynab-GFP - 02.tif	94	not GFP	94
		Dynab-EGFP		2	1	381	7	58	0419-0314-0305	Dynab-GFP - 02.tif	58	not GFP	58
		Dynab-EGFP		4	3	517	6	31	0544-0304-0309	Dynab-GFP - 02.tif	31	not GFP	31
		Dynab-EGFP		1	2	324	5	31	0344-0269-0242	Dynab-GFP - 02.tif	31	not GFP	31
		Dynab-EGFP		1	0	62	14	165	0108-0233-0272	Dynab-GFP - 02.tif	165	not GFP	165
		Dynab-EGFP		1	0	65	8	166	0076-0235-0215	Dynab-GFP - 02.tif	166	not GFP	166
		Dynab-EGFP		2	0	81	5	51	0136-0225-0224	Dynab-GFP - 02.tif	51	not GFP	51
		Dynab-EGFP		1	2	434	6	31	0431-0215-0238	Dynab-GFP - 02.tif	31	not GFP	31
		Dynab-EGFP		1	0	381	8	113	0514-0176-0277	Dynab-GFP - 02.tif	113	not GFP	113
		Dynab-EGFP		1	0	44	5	100	0244-0181-0321	Dynab-GFP - 02.tif	100	not GFP	100
		Dynab-EGFP		2	0	178	7	108	0	0	108	not GFP	108
		Dynab-EGFP		1	2	512	6	41	0551-0157-0317	Dynab-GFP - 02.tif	41	not GFP	41
		Dynab-EGFP		1	4	48	7	69	0093-0365-0150	Dynab-GFP - 04.tif	69	not GFP	69
		Dynab-EGFP		1	0	213	10	247	0461-0413-0147	Dynab-GFP - 04.tif	247	not GFP	247
		Dynab-EGFP		2	0	454	9	81	0541-0405-0167	Dynab-GFP - 04.tif	81	not GFP	81
		Dynab-EGFP		1	1	345	9	110	0436-0409-0171	Dynab-GFP - 04.tif	110	not GFP	110
		Dynab-EGFP		4	1	516	10	74	0597-0420-0195	Dynab-GFP - 04.tif	74	not GFP	74
		Dynab-EGFP		1	1	149	6	56	0166-0351-0220	Dynab-GFP - 04.tif	56	not GFP	56
		Dynab-EGFP		1	1	72	6	407	0513-0343-0156	Dynab-GFP - 04.tif	407	not GFP	407
		Dynab-EGFP		1	0	243	9	171	0345-0365-0196	Dynab-GFP - 04.tif	171	not GFP	171
		Dynab-EGFP		3	1	308	5	43	0347-0382-0241	Dynab-GFP - 04.tif	43	not GFP	43
		Dynab-EGFP		1	2	188	11	105	0304-0390-0200	Dynab-GFP - 04.tif	105	not GFP	105
		Dynab-EGFP		1	0	213	7	123	0266-0337-0212	Dynab-GFP - 04.tif	123	not GFP	123
		Dynab-EGFP		1	1	328	9	68	0374-0351-0226	Dynab-GFP - 04.tif	68	not GFP	68
		Dynab-EGFP		1	0	344	6	64	0374-0354-0233	Dynab-GFP - 04.tif	64	not GFP	64
		Dynab-EGFP		1	0	102	9	122	0173-0293-0209	Dynab-GFP - 04.tif	122	not GFP	122
		Dynab-EGFP		1	0	83	8	172	0109-0293-0224	Dynab-GFP - 04.tif	172	not GFP	172
		Dynab-EGFP		1	0	337	8	121	0365-0264-0256	Dynab-GFP - 04.tif	121	not GFP	121
		Dynab-EGFP		2	1	457	6	95	0486-0253-0261	Dynab-GFP - 04.tif	95	not GFP	95
		Dynab-EGFP		1	0	244	7	149	0313-0264-0268	Dynab-GFP - 04.tif	149	not GFP	149
		Dynab-EGFP		1	0	140	8	224	0362-0269-0334	Dynab-GFP - 04.tif	224	not GFP	224
		Dynab-EGFP		1	3	34	7	44	0073-0065-0289	Dynab-GFP - 05.tif	44	not GFP	44
		Dynab-EGFP		2	3	223	10	185	0	0	185	not GFP	185
		Dynab-EGFP		1	0	381	7	69	0453-0097-0296	Dynab-GFP - 05.tif	69	not GFP	69
		Dynab-EGFP		1	0	360	9	151	0459-0101-0320	Dynab-GFP - 05.tif	151	not GFP	151
		Dynab-EGFP		1	1	483	10	81	0576-0104-0335	Dynab-GFP - 05.tif	81	not GFP	81
		Dynab-EGFP		1	0	271	6	17	0282-0150-0320	Dynab-GFP - 05.tif	17	not GFP	17
		Dynab-EGFP		2	0	329	11	111	0421-0144-0295	Dynab-GFP - 05.tif	111	not GFP	111
		Dynab-EGFP		2	0	294	12	57	0344-0165-0265	Dynab-GFP - 05.tif	57	not GFP	57
		Dynab-EGFP		1	0	87	14	119	0195-0187-0306	Dynab-GFP - 05.tif	119	not GFP	119
		Dynab-EGFP		1	0	141	9	50	0178-0204-0283	Dynab-GFP - 05.tif	50	not GFP	50
		Dynab-EGFP		1	2	192	5	76	0001-0206-0199	Dynab-GFP - 05.tif	76	not GFP	76
		Dynab-EGFP		2	3	292	5	92	0	0	92	not GFP	92
		Dynab-EGFP		3	3	525	5	72	0	0	72	not GFP	72
		Dynab-EGFP		1	0	32	7	48	0067-0204-0174	Dynab-GFP - 05.tif	48	not GFP	48
		Dynab-EGFP		1	0	68	8	94	0154-0203-0145	Dynab-GFP - 05.tif	94	not GFP	94
		Dynab-EGFP		1	0	536	7	36	0561-0188-0153	Dynab-GFP - 05.tif	36	not GFP	36
		Dynab-EGFP		2	1	326	8	82	0372-0163-0095	Dynab-GFP - 05.tif	82	not GFP	82
		Dynab-EGFP		2	0	177	6	72	0243-0266-0114	Dynab-GFP - 05.tif	72	not GFP	72
		Dynab-EGFP		1	1	344	7	78	0387-0257-0155	Dynab-GFP - 05.tif	78	not GFP	78
		Dynab-EGFP		1	2	477	7	50	0512-0284-0195	Dynab-GFP - 05.tif	50	not GFP	50
		Dynab-EGFP		1	0	310	7	115	0430-0240-0199	Dynab-GFP - 05.tif	115	not GFP	115
		Dynab-EGFP		1	1	237	8	75	0288-0319-0218	Dynab-GFP - 05.tif	75	not GFP	75
		Dynab-EGFP		1	1	372	6	34	0220-0326-0215	Dynab-GFP - 05.tif	34	not GFP	34
		Dynab-EGFP		2	2	418	10	78	0	0	78	not GFP	78
		Dynab-EGFP		1	1	336	9	93	0332-0351-0209	Dynab-GFP - 05.tif	93	not GFP	93
		Dynab-EGFP		1	0	366	5	31	0373-0406-0298	Dynab-GFP - 05.tif	31	not GFP	31
		Dynab-EGFP		2	0	525	8	53	0558-0374-0245	Dynab-GFP - 05.tif	53	not GFP	53
		Dynab-EGFP		1	2	160	6	62	0198-0330-0327	Dynab-GFP - 05.tif	62	not GFP	62
		Dynab-EGFP		1	3	117	5	43	0266-0322-0320	Dynab-GFP - 05.tif	43	not GFP	43
		Dynab-EGFP		2	0	238	8	45	0	0	45	not GFP	45
		Dynab-EGFP		1	0	360	7	47	0404-0271-0313	Dynab-GFP - 05.tif	47	not GFP	47
	17.09.20	EGFP		1	0	15	7	47	0033-0301-0234	GFP - 01.tif	47	47	not Dynab
		EGFP		3	0	384	8	83	0	0	83	83	not Dynab
		EGFP		1	0	139	7	34	0205-0284-0199	GFP - 01.tif	34	34	not Dynab
		EGFP		2	0	192	6	45	0	0	45	45	not Dynab
		EGFP		1	0	439	7	13	0448-0232-0173	GFP - 01.tif	13	13	not Dynab
		EGFP		3	2	505	4	47	0520-0258-0170	GFP - 01.tif	47	47	not Dynab
		EGFP		3	0	378	6	45	0491-0252-0166	GFP - 01.tif	45	45	not Dynab
		EGFP		1	2	127	7	85	0198-0295-0244	GFP - 01.tif	85	85	not Dynab
		EGFP		1	0	225	10	79	0283-0309-0258	GFP - 01.tif	79	79	not Dynab
		EGFP		1	0	177	11	109	0230-0283-0263	GFP - 01.tif	109	109	not Dynab
		EGFP		3	0	512	6	43	0543-0278-0298	GFP - 01.tif	43	43	not Dynab
		EGFP		1	3	39	8	74	0082-0354-0288	GFP - 01.tif	74	74	not Dynab
		EGFP		1	0	62	12	160	0230-0252-0341	GFP - 01.tif	160	160	not Dynab
		EGFP		1	1	78	7	37	0102-0209-0316	GFP - 01.tif	37	37	not Dynab
		EGFP		2	0	221	9	83	0285-0373-0287	GFP - 02.tif	83	83	not Dynab
		EGFP		2	3	310	6	47	0327-0343-0250	GFP - 02.tif	47	47	not Dynab
		EGFP		2	0	359	8	215	0370-0300-0284	GFP - 02.tif	215	215	not Dynab
		EGFP		1	0	163	5	77	0154-0273-0253	GFP - 02.tif	77	77	not Dynab
		EGFP		1	0	87	5	146	0150-0275-0248	GFP - 02.tif	146	146	not Dynab
		EGFP		1	0	348	6	106	0408-0298-0306	GFP - 02.tif	106	106	not Dynab
		EGFP		1	0	99	6	142	0216-0250-0274	GFP - 02.tif	142	142	not Dynab
		EGFP		1	0	99	7	248	0314-0153-0290	GFP - 02.tif	248	248	not Dynab
		EGFP		1	0	114	8	215	0336-0146-0269	GFP - 02.tif	215	215	not Dynab
		EGFP		2	1	364	6	95	0	0	95	95	not Dynab
		EGFP		3	2	492	4	49	0	0	49	49	not Dynab
		EGFP		3	1	438	7	75	0481-0175-0255	GFP - 02.tif	75	75	not Dynab
		EGFP		5	0	358	9	115	0449-0254-0163	GFP - 02.tif	115	115	not Dynab
		EGFP		1	0	152	11	318	0445-0158-0156	GFP - 02.tif	318	318	not Dynab
		EGFP		1	1	156	8	42	0171-0369-0319	GFP - 03.tif	42	42	not Dynab
		EGFP		2	0	330	7	20	0347-0363-0304	GFP - 03.tif	20	20	not Dynab
		EGFP		1	0	464	7	80	0486-0334-0278	GFP - 03.tif	80	80	not Dynab
		EGFP		1	0	221	9	83	0255-0303-0270	GFP - 03.tif	83	83	not Dynab
		EGFP		2	0	424	7	25	0439-0332-0211	GFP - 03.tif	25	25	not Dynab
		EGFP		1	0	439	6	33	0462-0336-0187	GFP - 03.tif	33	33	not Dynab
		EGFP		3	0	510	8	55	0537-0320-0222	GFP - 03.tif	55	55	not Dynab
		EGFP		1	0	331	7	133	0426-0323-0224	GFP - 03.tif	133	133	not Dynab
		EGFP		1	0	52	7	60	0068-0328-0161	GFP - 03.tif	60	60	not Dynab
		EGFP		1	0	77	5	129	0122-0259-0164	GFP - 03.tif	129	129	not Dynab
		EGFP		3	0	394	10	176	0570-0263-0270	GFP - 03.tif	176	176	not Dynab
		EGFP		1	0	266	8	110	0369-0210-0247	GFP - 03.tif	110	110	not Dynab
		EGFP		1	0	138	11	91	0223-0185-0287	GFP - 03.tif	91	91	not Dynab
		EGFP		1	0	212	7	75	0235-0221-0276	GFP - 03.tif	75	75	not Dynab
		EGFP		1	0	278	6	67	0301-0213-0285	GFP - 03.tif	67	67	not Dynab
		EGFP		1	0	357	7	93	0388-0213-0309	GFP - 03.tif	93	93	not Dynab
		EGFP		1	0	63	5	13	0070-0405-0127	GFP - 04.tif	13	13	not Dynab
		EGFP		1	0	189	6	45	0202-0277-0162	GFP - 04.tif	45	45	not Dynab
		EGFP		2	0	144	10	64	0206-0258-0154	GFP - 04.tif	64	64	not Dynab
		EGFP		4	0	489	6	79	0469-0260-0171	GFP - 04.tif	79	79	not Dynab
		EGFP		1	1	236	7	54	0279-0229-0166	GFP - 04.tif	54	54	not Dynab
		EGFP		1	0	212	13	221	0235-0246-0228	GFP - 04.tif	221	221	not Dynab
		EGFP		1	0	418	5	116	0542-0251-0205	GFP - 04.tif	116	116	not Dynab
		EGFP		2	0	224	5	68	0432-0254-0200	GFP - 04.tif	68	68	not Dynab
		EGFP		3	0	299	5	104	0	0	104	104	not Dynab
		EGFP		2	1	151	5	52	0198-0087-0300	GFP - 04.tif	52	52	not Dynab
		EGFP		1	0	140	6	52	0176-0112-0303	GFP - 04.tif	52	52	not Dynab
		EGFP		2	0	288	6	37	0	0	37	37	not Dynab
		EGFP		1	3	338	7	77	0401-0210-0299	GFP - 04.tif	77	77	not Dynab
		EGFP		1	2	43	6	104	0002-0242-0311	GFP - 04.tif	104	104	not Dynab
		EGFP		1	0	110	8	107	0176-0247-0255	GFP - 04.tif	107	107	not Dynab
		EGFP		1	1	142	8	74	0200-0274-0268	GFP - 04.tif	74	74	not Dynab
		EGFP		2	0	476	7	73	0530-0285-0252	GFP - 04.tif	73	73	not Dynab
		EGFP		2	0	170	8	124	0279-0287-0284	GFP - 04.tif	124	124	not Dynab
		EGFP		1	0	25	7	24	0038-0265-0359	GFP - 04.tif	24	24	not Dynab
		EGFP		1	1	131	6	40	0158-0269-0331	GFP - 04.tif	40	40	not Dynab
		EGFP		1	0	299	9	115	0426-0324-0335	GFP - 04.tif	115	115	not Dynab
		EGFP		2	2	459	9	88	0528-0332-0349	GFP - 04.tif	88	88	not Dynab
		EGFP		1	0	57	7	35	0069-0341-0316	GFP - 04.tif	35	35	not Dynab
		EGFP		1	0	28	8	56	0067-0328-0281	GFP - 04.tif	56	56	not Dynab
		EGFP		1	1	8	11	73	0180-0368-0244	GFP - 04.tif	73	73	not Dynab
		EGFP		2	3	94	8	72	0	0	72	72	not Dynab
		EGFP		1	1	97	6	66	0188-0373-0228	GFP - 04.tif	66	66	not Dynab
		EGFP		1	1	125	8	76	0183-0367-0209	GFP - 04.tif	76	76	not Dynab
		EGFP		1	1	17	7	40	0039-0388-0151	GFP - 05.tif	40	40	not Dynab
		EGFP		1	0	384	7	68	0417-0373-0139	GFP - 05.tif	68	68	not Dynab
		EGFP		1	3	394	7	44	0431-0364-0154	GFP - 05.tif	44	44	not Dynab
		EGFP		1	0	453	9	133	0596-0364-0161	GFP - 05.tif	133	133	not Dynab
		EGFP		1	0	216	8	106	0334-0381-0169	GFP - 05.tif	106	106	not Dynab
		EGFP		2	2	441	7	55	0462-0392-0221	GFP - 05.tif	55	55	not Dynab
		EGFP		1	0	175	8	143	0292-0381-0214	GFP - 05.tif	143	143	not Dynab
		EGFP		2	0	301	7	37	0331-0379-0232	GFP - 05.tif	37	37	not Dynab
		EGFP		1	1	518	6	47	0552-0371-0251	GFP - 05.tif	47	47	not Dynab
		EGFP		1	0	377	10	69	0403-0360-0235	GFP - 05.tif	69	69	not Dynab
		EGFP		1	0	50	9	41	0092-0329-0240	GFP - 05.tif	41	41	not Dynab
		EGFP		3	0	496	9	91	0	0	91	91	not Dynab
		EGFP		4	0	460	9	59	0481-0327-0256	GFP - 05.tif	59	59	not Dynab
		EGFP		1	0	384	8	97	0481-0313-0284	GFP - 05.tif	97	97	not Dynab
		EGFP		1	0	197	7	29	0210-0355-0309	GFP - 05.tif	29	29	not Dynab
		EGFP		1	1	96	7	25	0105-0283-0330	GFP - 05.tif	25	25	not Dynab
		EGFP		4	0	358	11	138	0340-0282-0325	GFP - 05.tif	138	138	not Dynab
		EGFP		2	0	266	6	63	0314-0208-0345	GFP - 05.tif	63	63	not Dynab
		EGFP		1	0	544	6	30	0560-0195-0339	GFP - 05.tif	30	30	not Dynab
		EGFP		1	0	140	9	52	0174-0189-0352	GFP - 05.tif	52	52	not Dynab
		EGFP		3	2	394	5	20	0402-0181-0347	GFP - 05.tif	20	20	not Dynab
		EGFP		3	0	173	8	80	0227-0135-0338	GFP - 05.tif	80	80	not Dynab
		EGFP		1	0	14	9	36	0037-0124-0338	GFP - 05.tif	36	36	not Dynab
		EGFP		1	4	65	5	22	0076-0135-0380	GFP - 05.tif	22	22	not Dynab
		Dynab-EGFP		1	1	54	8	20	0074-0318-0073	Dynab - 01.tif	20	not GFP	20
		Dynab-EGFP		2	0	196	8	25	0209-0297-0091	Dynab - 01.tif	25	not GFP	25
		Dynab-EGFP		2	0	117	10	149	0255-0266-0090	Dynab - 01.tif	149	not GFP	149
		Dynab-EGFP		1	0	357	7	211	0576-0282-0131	Dynab - 01.tif	211	not GFP	211
		Dynab-EGFP		1	1	192	8	254	0452-0244-0156	Dynab - 01.tif	254	not GFP	254
		Dynab-EGFP		1	0	210	8	49	0243-0235-0158	Dynab - 01.tif	49	not GFP	49
		Dynab-EGFP		1	2	92	9	274	0132-0247-0137	Dynab - 01.tif	274	not GFP	274
		Dynab-EGFP		1	0	185	10	101	0244-0259-0144	Dynab - 01.tif	101	not GFP	101
		Dynab-EGFP		1	1	190	11	207	0408-0276-0167	Dynab - 01.tif	207	not GFP	207
		Dynab-EGFP		1	0	116	7	80	0107-0217-0164	Dynab - 01.tif	80	not GFP	80
		Dynab-EGFP		1	0	54	8	133	0061-0225-0159	Dynab - 01.tif	133	not GFP	133
		Dynab-EGFP		1	0	75	5	58	0114-0228-0204	Dynab - 01.tif	58	not GFP	58
		Dynab-EGFP		1	0	104	8	96	0183-0231-0250	Dynab - 01.tif	96	not GFP	96
		Dynab-EGFP		2	4	459	4	48	0	0	48	not GFP	48
		Dynab-EGFP		1	0	490	8	47	0508-0244-0240	Dynab - 01.tif	47	not GFP	47
		Dynab-EGFP		1	2	66	7	243	0300-0240-0232	Dynab - 01.tif	243	not GFP	243
		Dynab-EGFP		2	1	514	5	34	0530-0197-0179	Dynab - 01.tif	34	not GFP	34
		Dynab-EGFP		2	0	225	8	156	0384-0083-0249	Dynab - 01.tif	156	not GFP	156
		Dynab-EGFP		1	0	33	5	64	0086-0112-0251	Dynab - 01.tif	64	not GFP	64
		Dynab-EGFP		1	0	334	8	138	0378-0128-0282	Dynab - 01.tif	138	not GFP	138
		Dynab-EGFP		2	0	509	6	68	0552-0116-0271	Dynab - 01.tif	68	not GFP	68
		Dynab-EGFP		1	0	419	7	122	0467-0111-0299	Dynab - 01.tif	122	not GFP	122
		Dynab-EGFP		2	0	378	5	122	0476-0078-0358	Dynab - 01.tif	122	not GFP	122
		Dynab-EGFP		1	1	219	8	283	0507-0095-0316	Dynab - 01.tif	283	not GFP	283
		Dynab-EGFP		3	0	333	5	70	0359-0121-0326	Dynab - 01.tif	70	not GFP	70
		Dynab-EGFP		1	1	325	4	88	0347-0127-0329	Dynab - 01.tif	88	not GFP	88
		Dynab-EGFP		1	0	311	8	118	0400-0120-0345	Dynab - 01.tif	118	not GFP	118
		Dynab-EGFP		1	0	427	8	106	0509-0164-0346	Dynab - 01.tif	106	not GFP	106
		Dynab-EGFP		1	0	68	6	45	0100-0173-0269	Dynab - 01.tif	45	not GFP	45
		Dynab-EGFP		2	0	242	7	74	0278-0202-0334	Dynab - 01.tif	74	not GFP	74
		Dynab-EGFP		1	2	191	8	57	0238-0231-0272	Dynab - 01.tif	57	not GFP	57
		Dynab-EGFP		3	0	288	8	107	0408-0219-0335	Dynab - 01.tif	107	not GFP	107
		Dynab-EGFP		1	0	265	6	43	0301-0265-0364	Dynab - 01.tif	43	not GFP	43
		Dynab-EGFP		1	1	262	6	42	0279-0295-0380	Dynab - 01.tif	42	not GFP	42
		Dynab-EGFP		1	0	457	7	58	0489-0291-0376	Dynab - 01.tif	58	not GFP	58
		Dynab-EGFP		1	0	419	7	51	0458-0292-0394	Dynab - 01.tif	51	not GFP	51
		Dynab-EGFP		1	0	370	9	158	0475-0298-0399	Dynab - 01.tif	158	not GFP	158
		Dynab-EGFP		1	0	526	6	44	0546-0315-0400	Dynab - 01.tif	44	not GFP	44
		Dynab-EGFP		1	0	421	6	108	0516-0317-0424	Dynab - 01.tif	108	not GFP	108
		Dynab-EGFP		2	0	249	8	61	0295-0355-0448	Dynab - 01.tif	61	not GFP	61
		Dynab-EGFP		1	0	101	6	111	0119-0352-0475	Dynab - 01.tif	111	not GFP	111
		Dynab-EGFP		2	0	347	7	57	0391-0346-0465	Dynab - 01.tif	57	not GFP	57
		Dynab-EGFP		1	0	61	6	90	0165-0148-0164	Dynab - 03.tif	90	not GFP	90
		Dynab-EGFP		2	0	184	6	108	0	0	108	not GFP	108
		Dynab-EGFP		1	1	236	7	111	0344-0102-0190	Dynab - 03.tif	111	not GFP	111
		Dynab-EGFP		1	0	77	4	69	0139-0126-0168	Dynab - 03.tif	69	not GFP	69
		Dynab-EGFP		1	0	108	7	104	0091-0169-0207	Dynab - 03.tif	104	not GFP	104
		Dynab-EGFP		2	0	152	8	63	0178-0127-0279	Dynab - 03.tif	63	not GFP	63
		Dynab-EGFP		1	0	17	9	56	0080-0124-0293	Dynab - 03.tif	56	not GFP	56
		Dynab-EGFP		1	0	213	6	40	0237-0197-0330	Dynab - 03.tif	40	not GFP	40
		Dynab-EGFP		2	0	444	5	102	0463-0202-0309	Dynab - 03.tif	102	not GFP	102
		Dynab-EGFP		2	0	103	7	171	0299-0235-0342	Dynab - 03.tif	171	not GFP	171
		Dynab-EGFP		1	0	118	7	176	0319-0255-0309	Dynab - 03.tif	176	not GFP	176
		Dynab-EGFP		1	1	206	8	269	0504-0316-0262	Dynab - 03.tif	269	not GFP	269
		Dynab-EGFP		1	1	144	8	117	0180-0318-0288	Dynab - 03.tif	117	not GFP	117
		Dynab-EGFP		1	2	121	6	118	0160-0330-0240	Dynab - 03.tif	118	not GFP	118
		Dynab-EGFP		1	0	27	8	55	0050-0410-0161	Dynab - 03.tif	55	not GFP	55
		Dynab-EGFP		1	0	321	6	62	0343-0406-0155	Dynab - 03.tif	62	not GFP	62
		Dynab-EGFP		1	0	43	8	75	0065-0261-0170	Dynab - 03.tif	75	not GFP	75
		Dynab-EGFP		1	0	99	7	136	0236-0242-0240	Dynab - 03.tif	136	not GFP	136
		Dynab-EGFP		1	1	9	6	38	0036-0205-0145	Dynab - 05.tif	38	not GFP	38
		Dynab-EGFP		1	0	68	7	177	0258-0210-0166	Dynab - 05.tif	177	not GFP	177
		Dynab-EGFP		1	0	7	6	95	0064-0202-0180	Dynab - 05.tif	95	not GFP	95
		Dynab-EGFP		1	0	260	7	89	0329-0217-0174	Dynab - 05.tif	89	not GFP	89
		Dynab-EGFP		2	0	440	7	60	0508-0213-0169	Dynab - 05.tif	60	not GFP	60
		Dynab-EGFP		1	0	265	5	43	0280-0221-0158	Dynab - 05.tif	43	not GFP	43
		Dynab-EGFP		2	0	215	7	121	0331-0179-0156	Dynab - 05.tif	121	not GFP	121
		Dynab-EGFP		1	0	376	6	68	0453-0193-0187	Dynab - 05.tif	68	not GFP	68
		Dynab-EGFP		1	0	115	6	61	0132-0183-0205	Dynab - 05.tif	61	not GFP	61
		Dynab-EGFP		2	0	233	6	41	0281-0164-0198	Dynab - 05.tif	41	not GFP	41
		Dynab-EGFP		1	0	63	6	55	0070-0272-0211	Dynab - 05.tif	55	not GFP	55
		Dynab-EGFP		4	0	375	7	68	0418-0253-0263	Dynab - 05.tif	68	not GFP	68
		Dynab-EGFP		2	0	318	5	91	0341-0264-0255	Dynab - 05.tif	91	not GFP	91
		Dynab-EGFP		1	0	219	7	59	0268-0244-0311	Dynab - 05.tif	59	not GFP	59
		Dynab-EGFP		1	0	234	6	58	0251-0235-0307	Dynab - 05.tif	58	not GFP	58
		Dynab-EGFP		1	0	430	7	88	0469-0204-0294	Dynab - 05.tif	88	not GFP	88
		Dynab-EGFP		1	0	546	6	40	0550-0202-0304	Dynab - 05.tif	40	not GFP	40
		Dynab-EGFP		3	0	456	6	55	0491-0237-0304	Dynab - 05.tif	55	not GFP	55
		Dynab-EGFP		2	0	185	6	210	0356-0240-0298	Dynab - 05.tif	210	not GFP	210
		Dynab-EGFP		1	0	440	6	69	0515-0232-0297	Dynab - 05.tif	69	not GFP	69
		Dynab-EGFP		1	0	196	7	209	0414-0228-0339	Dynab - 05.tif	209	not GFP	209
		Dynab-EGFP		3	0	372	6	55	0410-0259-0331	Dynab - 05.tif	55	not GFP	55
		Dynab-EGFP		2	0	282	6	68	0323-0259-0319	Dynab - 05.tif	68	not GFP	68
		Dynab-EGFP		1	0	375	5	88	0436-0295-0340	Dynab - 05.tif	88	not GFP	88
		Dynab-EGFP		2	0	474	6	40	0585-0291-0353	Dynab - 05.tif	40	not GFP	40
		Dynab-EGFP		1	0	125	5	117	0309-0360-0330	Dynab - 05.tif	117	not GFP	117
		Dynab-EGFP		1	0	21	7	184	0209-0398-0379	Dynab - 05.tif	184	not GFP	184
		Dynab-EGFP		2	0	294	5	40	0326-0421-0347	Dynab - 05.tif	40	not GFP	40
		Dynab-EGFP		1	0	45	8	51	0045-0387-0246	Dynab - 05.tif	51	not GFP	51
		Dynab-EGFP		1	0	113	11	44	0108-0380-0243	Dynab - 05.tif	44	not GFP	44
		Dynab-EGFP		1	0	324	6	92	0405-0327-0271	Dynab - 05.tif	92	not GFP	92
		Dynab-EGFP		1	0	155	7	58	0202-0315-0243	Dynab - 05.tif	58	not GFP	58
		Dynab-EGFP		1	0	60	6	48	0091-0326-0209	Dynab - 05.tif	48	not GFP	48
		Dynab-EGFP		1	0	89	5	42	0103-0330-0217	Dynab - 05.tif	42	not GFP	42
		Dynab-EGFP		1	0	97	7	62	0121-0320-0209	Dynab - 05.tif	62	not GFP	62
		Dynab-EGFP		1	1	193	7	80	0164-0328-0214	Dynab - 05.tif	80	not GFP	80
		Dynab-EGFP		2	4	283	4	30	0	0	30	not GFP	30
		Dynab-EGFP		1	0	67	8	68	0104-0269-0253	Dynab - 05.tif	68	not GFP	68
		Dynab-EGFP		1	1	35	8	88	0119-0069-0322	Dynab - 06.tif	88	not GFP	88
		Dynab-EGFP		2	0	262	7	11	0267-0054-0328	Dynab - 06.tif	11	not GFP	11
		Dynab-EGFP		1	0	292	10	51	0339-0033-0326	Dynab - 06.tif	51	not GFP	51
		Dynab-EGFP		1	0	174	6	47	0220-0043-0318	Dynab - 06.tif	47	not GFP	47
		Dynab-EGFP		2	0	260	8	86	0364-0103-0368	Dynab - 06.tif	86	not GFP	86
		Dynab-EGFP		1	0	276	6	58	0277-0099-0386	Dynab - 06.tif	58	not GFP	58
		Dynab-EGFP		1	0	276	8	192	0480-0161-0417	Dynab - 06.tif	192	not GFP	192
		Dynab-EGFP		1	0	435	7	29	0462-0165-0428	Dynab - 06.tif	29	not GFP	29
		Dynab-EGFP		1	0	69	8	62	0132-0098-0434	Dynab - 06.tif	62	not GFP	62
		Dynab-EGFP		1	1	22	6	81	0090-0188-0325	Dynab - 06.tif	81	not GFP	81
		Dynab-EGFP		1	1	337	7	98	0436-0198-0270	Dynab - 06.tif	98	not GFP	98
		Dynab-EGFP		1	1	19	6	96	0135-0195-0265	Dynab - 06.tif	96	not GFP	96
		Dynab-EGFP		1	0	37	4	15	0181-0234-0267	Dynab - 06.tif	15	not GFP	15
		Dynab-EGFP		2	4	99	4	38	0	0	38	not GFP	38
		Dynab-EGFP		1	1	82	4	19	0096-0230-0262	Dynab - 06.tif	19	not GFP	19
		Dynab-EGFP		1	0	345	8	101	0432-0234-0231	Dynab - 06.tif	101	not GFP	101
		Dynab-EGFP		2	0	326	7	65	0336-0247-0222	Dynab - 06.tif	65	not GFP	65
		Dynab-EGFP		2	0	181	10	131	0318-0245-0220	Dynab - 06.tif	131	not GFP	131
		Dynab-EGFP		1	0	360	7	41	0396-0264-0227	Dynab - 06.tif	41	not GFP	41
		Dynab-EGFP		1	0	152	10	118	0269-0264-0215	Dynab - 06.tif	118	not GFP	118
		Dynab-EGFP		1	0	247	7	85	0325-0279-0216	Dynab - 06.tif	85	not GFP	85
		Dynab-EGFP		1	0	328	8	113	0447-0266-0189	Dynab - 06.tif	113	not GFP	113
		Dynab-EGFP		1	0	341	7	112	0368-0279-0176	Dynab - 06.tif	112	not GFP	112
		Dynab-EGFP		1	2	21	5	50	0083-0262-0138	Dynab - 06.tif	50	not GFP	50
		Dynab-EGFP		1	0	80	9	130	0091-0280-0139	Dynab - 06.tif	130	not GFP	130
		Dynab-EGFP		1	0	47	5	139	0035-0326-0137	Dynab - 06.tif	139	not GFP	139
		Dynab-EGFP		1	0	337	4	40	0360-0355-0185	Dynab - 06.tif	40	not GFP	40
		Dynab-EGFP		1	0	177	7	255	0435-0358-0147	Dynab - 06.tif	255	not GFP	255
		Dynab-EGFP		1	0	67	7	109	0180-0421-0149	Dynab - 06.tif	109	not GFP	109
		Dynab-EGFP		2	1	381	6	42	0420-0383-0209	Dynab - 06.tif	42	not GFP	42
