# Supplementary figures and images for: Uncoupling of dynamin polymerization and GTPase activity revealed by the conformation-specific nanobody dynab
Source: eLife journal article supplement (doi:10.7554/elife.25197), 2017-10-12

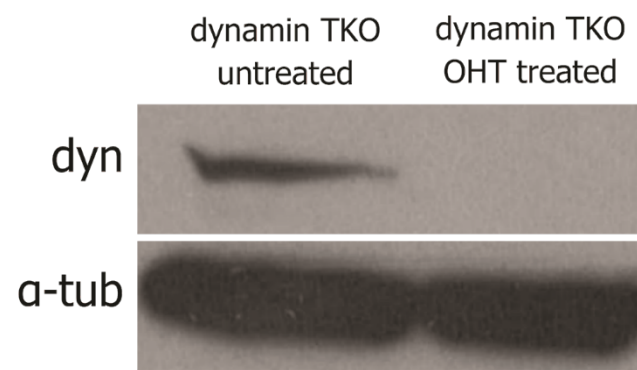

Supplement: supp [file elife-25197-supp-v1.zip]

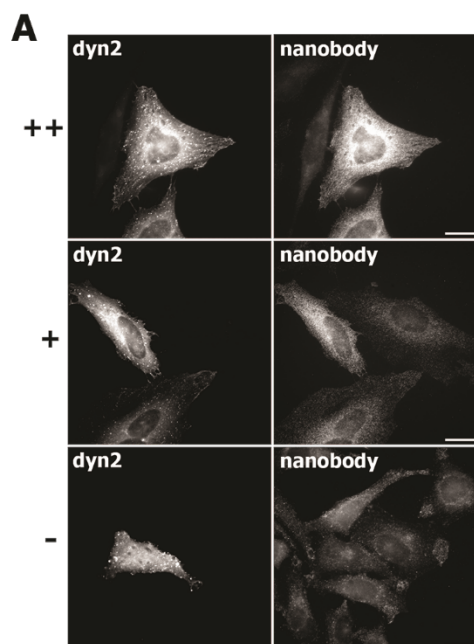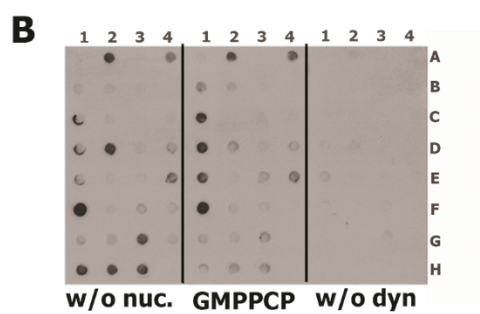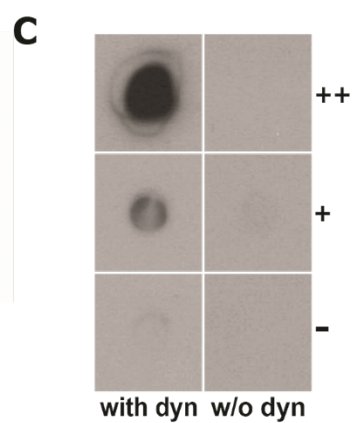

Supplement: supp [file elife-25197-supp-v1.zip]

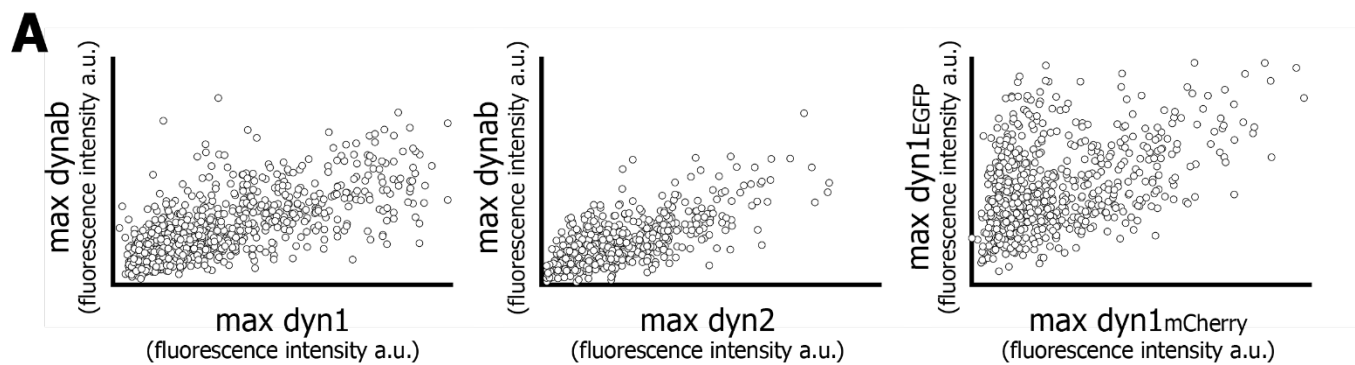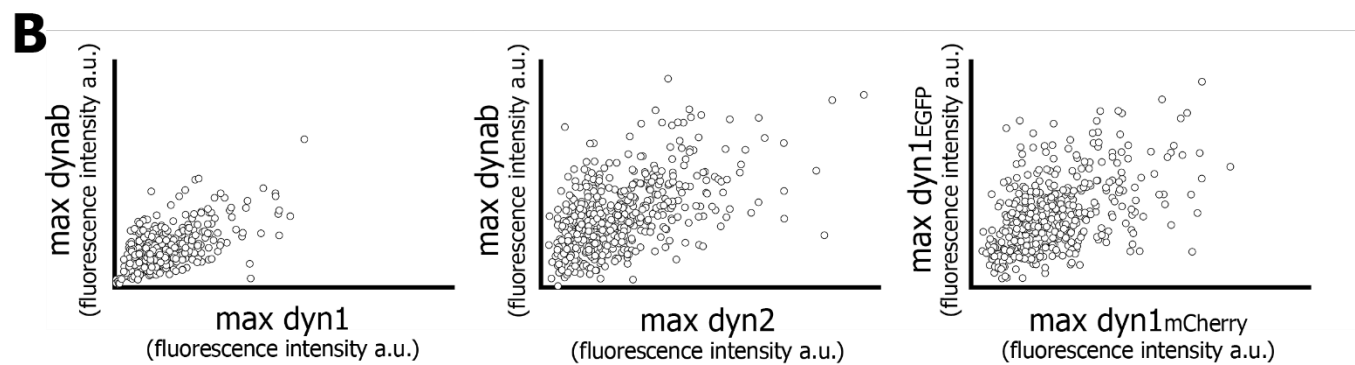

Supplement: supp [file elife-25197-supp-v1.zip]

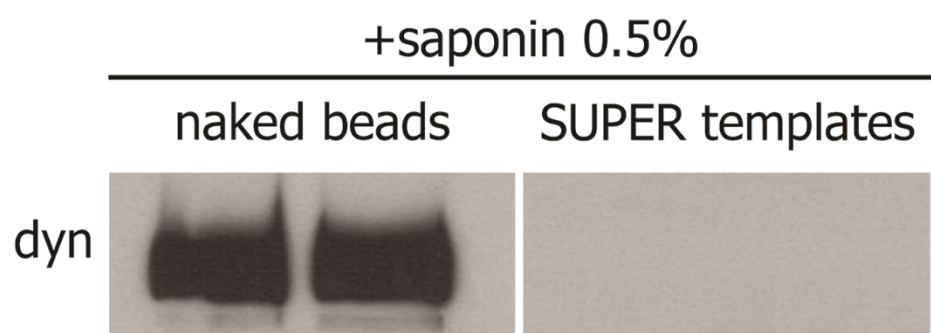

Supplement: supp [file elife-25197-supp-v1.zip]

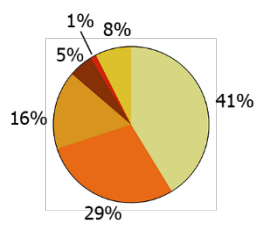

TKO

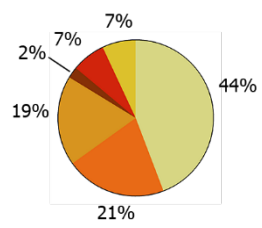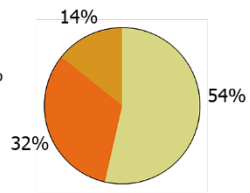

HeLa

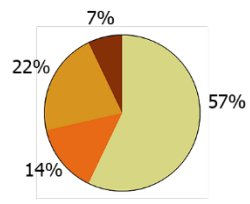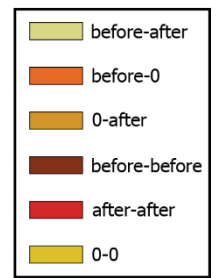

Supplement: supp [file elife-25197-supp-v1.zip]

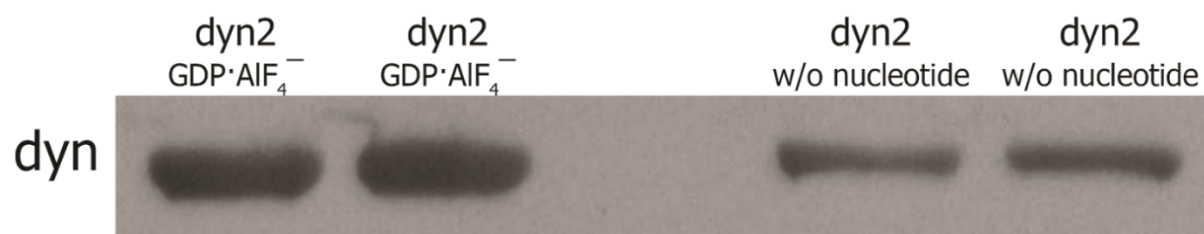

Supplement: supp [file elife-25197-supp-v1.zip]

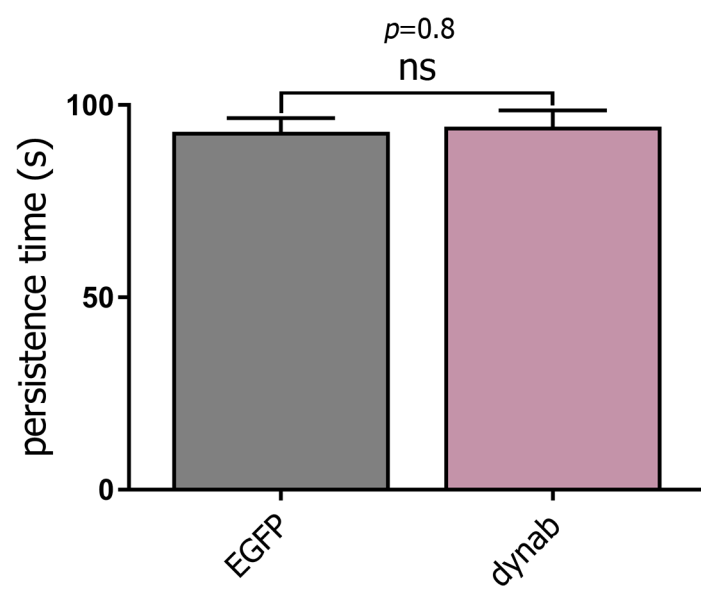

Supplement: supp [file elife-25197-supp-v1.zip]

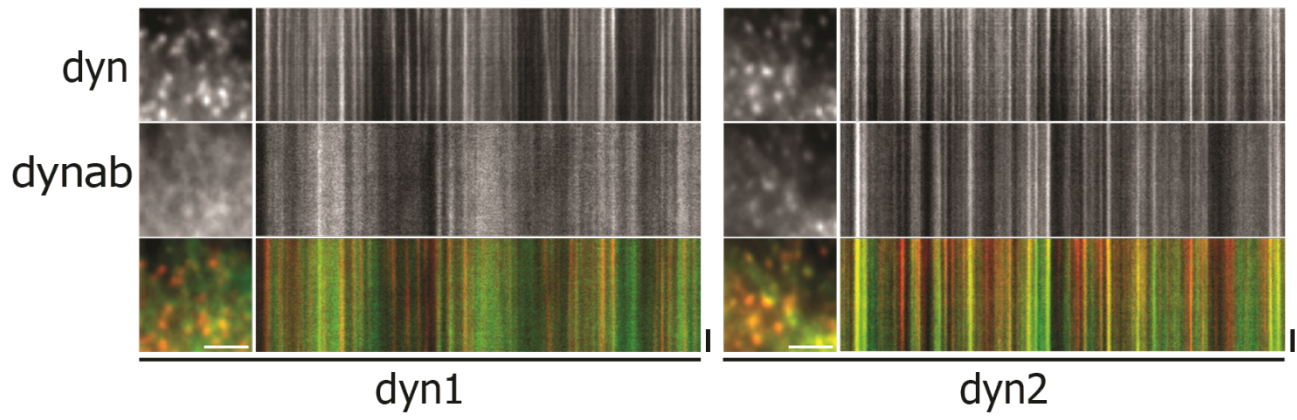

Supplement: supp [file elife-25197-supp-v1.zip]

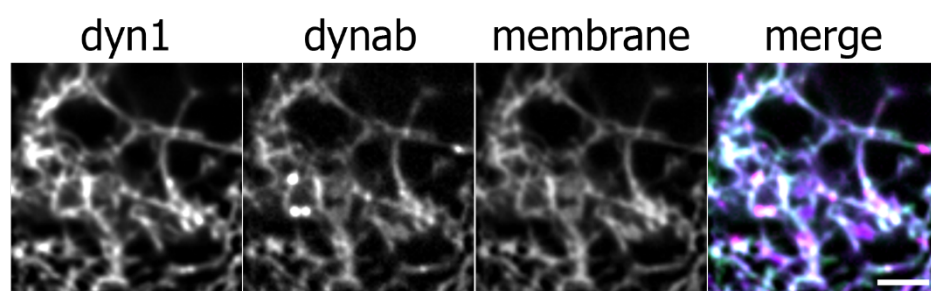

Supplement: supp [file elife-25197-supp-v1.zip]
